# Supplementary material for: Functionally Overlapping Variants Control Tuberculosis Susceptibility in Collaborative Cross Mice
Source: PubMed Central journal article supplement (PMC6879725; doi:10.1128/mbio.02791-19), 2019-11-26
Supplement: mBio.02791-19-sf001.pdf [file mBio.02791-19-sf001.pdf]

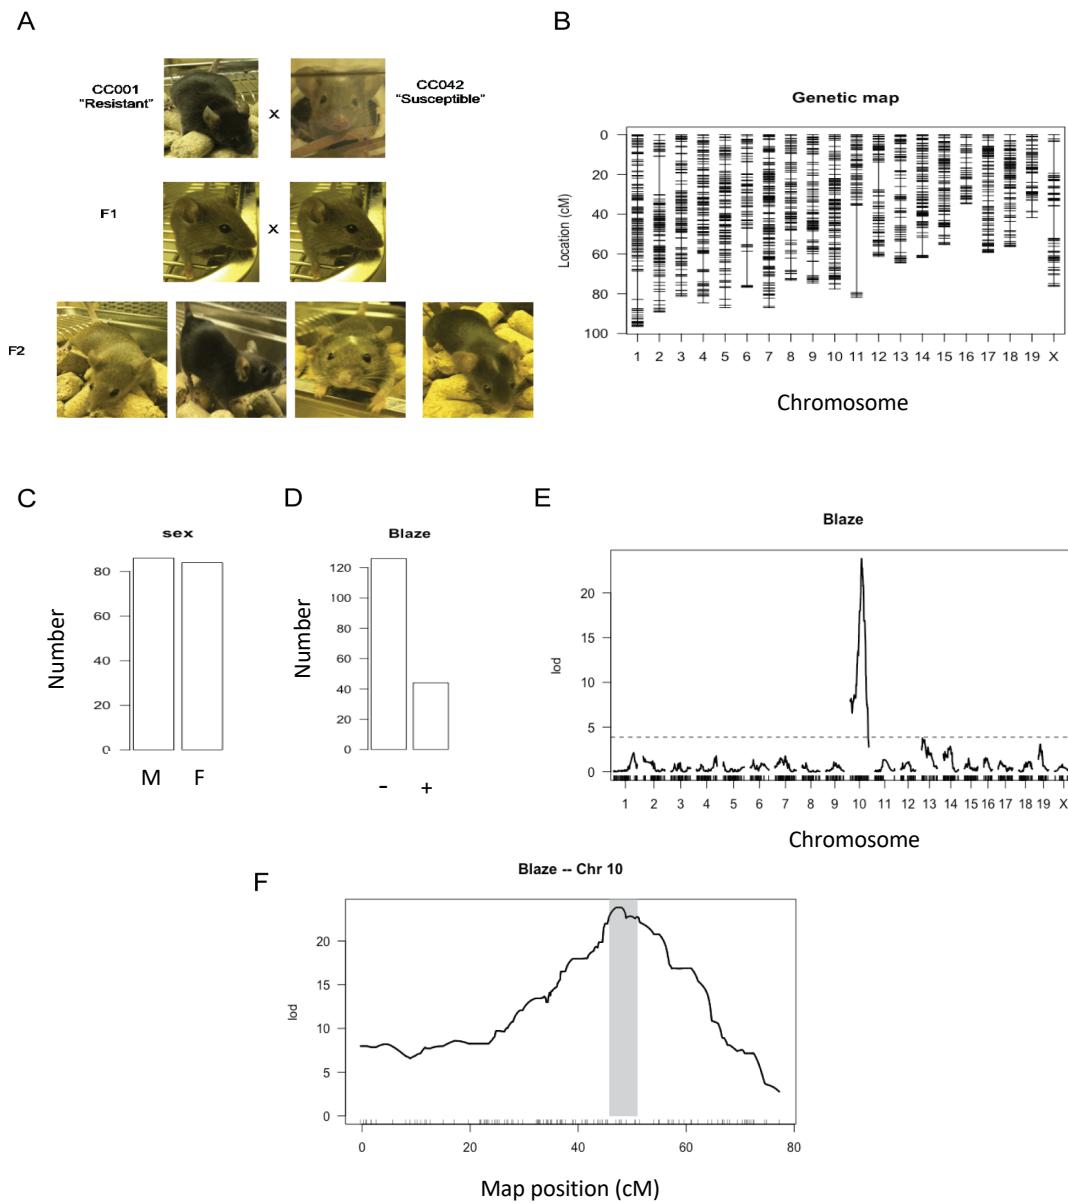

**Supplemental Figure 1. Description of F2 cross population and test scan for the Mendelian “Blaze” trait.** (A) Coat color phenotypes of parent mice, CC001 (black), CC042 (agouti with white head blaze), F<sub>1</sub> (agouti) and F<sub>2</sub> (agouti, black, agouti and head blaze, black and head blaze). (B) genetic map of F<sub>2</sub> population used in QTL studies. Vertical lines show Chromosomes (1-19 autosomes, X = X Chromosome). Horizontal ticks show marker location in cM. (C) Number of male vs. female mice (male=M, female=F). (D) Number of mice with no head blaze vs head blaze in F<sub>2</sub> mice (no head blaze=- ; head blaze=+). (E) Results of genome scan for “Blaze” trait. (F) Bayes interval for the “Blaze” trait on chromosome 10 (shaded) containing *Kitl*, previously shown to be associated with the WSB<sup>blaze</sup> phenotype (Aylor DL *et al.* 2011. *Genome Research* 21:1213–1222).
