# Supplementary material for: Functionally Overlapping Variants Control Tuberculosis Susceptibility in Collaborative Cross Mice
Source: PubMed Central journal article supplement (PMC6879725; doi:10.1128/mbio.02791-19), 2019-11-26
Supplement: mBio.02791-19-sf003.pdf [file mBio.02791-19-sf003.pdf]

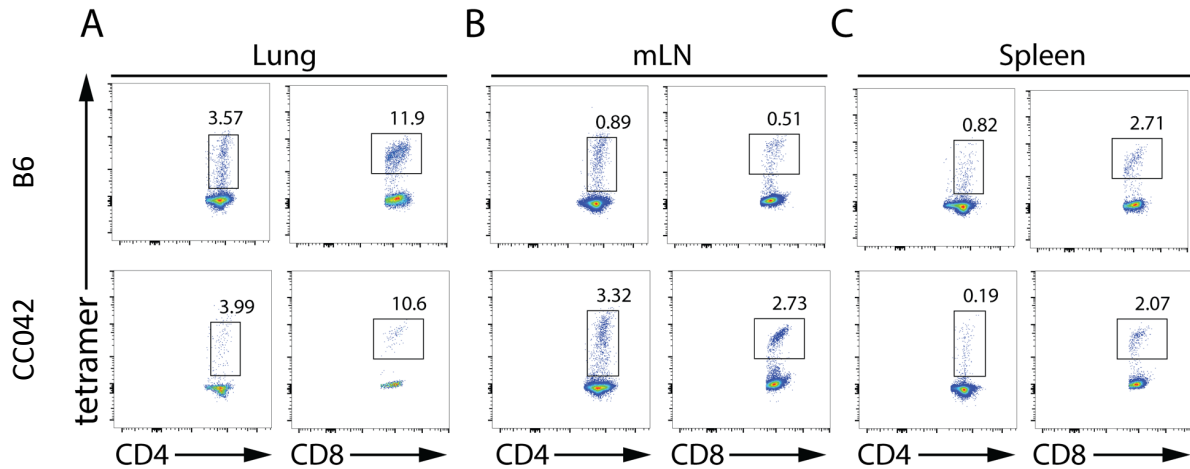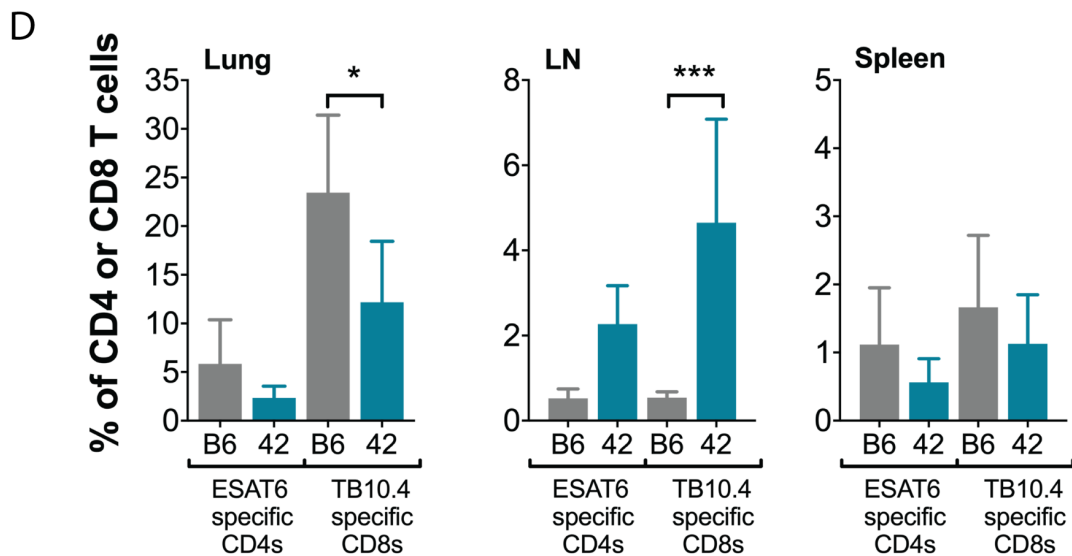

**Supplemental Figure 3. Frequency of antigen-specific T cells in B6 and CC042 following pulmonary Mtb infection.** Representative flow plots showing the frequencies of ESAT-6-specific CD4 T cells and TB10.4-specific CD8 T cells in the (A) Lung (B) mediastinal lymph node (mLN) and (C) spleen of B6 (grey shading) and CC042 (teal shading) mice at 4 weeks post pulmonary Mtb infection. Bar plots show mean + SD of ESAT-6-specific CD4 T cells and TB10.4-specific CD8 T cells in the (D) Lung (E) mLN and (F) spleen at the same timepoint. Sidak's multiple comparison test was used to determine significance where  $p < 0.05$  \*,  $p < 0.001$ \*\*\*.
